# Supplementary material for: A Novel Role for DNA Methyltransferase 1 in Regulating Oocyte Cytoplasmic Maturation in Pigs
Source: PLoS One. 2015 May 26;10(5):e0127512. doi: 10.1371/journal.pone.0127512 (PMC4444208; doi:10.1371/journal.pone.0127512)
Supplement: S1 File — Table A, the detail of primers for quantitative real time PCR, Table B, oocyte maturation and PA embryo development after GV stage oocytes injected with FITC labeled nonsilencing siRNA, Table C, the development of PA, IVF and SCNT embryos after siRNA injection into MII stage oocytes, and Table D, the development of PA embryos derived from GV stage oocytes injected with different interference siRNAs. (PDF) [file pone.0127512.s004.pdf]

**Table A in S1 File. PCR primers.** The primer sequence, amplified length and gene accession number for quantitative real time PCR.

**Table B in S1 File. Oocyte maturation and PA embryo development.** The maturation of oocytes and the development of PA embryos derived from GV stage oocytes injected with FITC labeled nonsilencing siRNA were examined, and FITC labeled nonsilencing siRNA injection did not impair oocyte maturation and PA embryo development. The normal group, culture of COCs, the control group, culture of denuded oocytes plus mural granulosa cells, and the GV-FITC group, culture of denuded oocytes injected with FITC labeled nonsilencing siRNA plus mural granulosa cells.

**Table C in S1 File. The development of embryos derived from oocytes with Dnmt1 knockdown at MII stage.** After siRNA injection into MII stage oocytes, the cleavage (at 48 h) and blastocyst (at 156 h) rates and blastocyst cell numbers of PA, IVF and SCNT embryos derived from these oocytes were examined, and siRNA injection at MII stage did not impair the development of PA, IVF and SCNT embryos.

**Table D in S1 File. The development of PA embryos after Dnmt1 knockdown.** The interference levels of siRNA-RFD, siRNA-BAH and siRNA-DCM were significantly different. After these interference sequences were injected into GV stage oocytes, and the significantly lower development of PA embryos, along with the obviously higher interference level of Dnmt1, was observed.

**Table A. Detail of primers for quantitative real time PCR.**

| <b>Gene</b>   | <b>Primer sequence (5'-3')</b> | <b>Length<br/>(bp)</b> | <b>Accession<br/>number</b> |
|---------------|--------------------------------|------------------------|-----------------------------|
| <b>Dnmt1</b>  | F:GCGTCTTGCAGGCTGGTCAGTA       | 152                    | NM_001032355                |
|               | R:CTTCTTATCATCGACCACGACGCT     |                        |                             |
| <b>Gdf9</b>   | F:CAAAGCCAACAGAAGTCACCTC       | 146                    | NM_001001909                |
|               | R: GTTCAACAGCAGTAACACGATCC     |                        |                             |
| <b>Bmp15</b>  | F:CCTGGACACTGCCTTCTTGTTACTCTA  | 195                    | NM_001005155                |
|               | TTTC                           |                        |                             |
| <b>Zar1</b>   | R: TGGTTACTTTCAGGCCCATCGTGCT   | 191                    | NM_001129956                |
|               | F: CTGCGCTTCCAGTTCTTAGAGC      |                        |                             |
| <b>Brg1</b>   | R: CACGCGATAAGGGTTATAAGACTTC   | 197                    | EU_780789                   |
|               | F: GCTCGGTCTGAACCTCCAATC       |                        |                             |
| <b>Mater</b>  | R: GGTCGACGTTGAGCTTGTA         | 122                    | AM_941716                   |
|               | F: GAATGATCGGGAACGTAGCTG       |                        |                             |
| <b>Hsf1</b>   | R: ACCAGGGAAGTTTAGTACACAAGC    | 136                    | NM_001243819                |
|               | F: CCCTGAGGAGTGAGGACATAAAG     |                        |                             |
| <b>Sod1</b>   | R: CACAGGGCCTCGTTCTCATG        | 184                    | NM_001190422                |
|               | F: TTGGAGACCTGGGCAATGTGAC      |                        |                             |
| <b>Oct4</b>   | R: CTCCAGCATTTCCTGCTTTGTA      | 185                    | NM_001113060                |
|               | F:GAAGGTGTTTCAGCCAAACGAC       |                        |                             |
| <b>Bax</b>    | R:CGATACTTGTCCGCTTTC           | 159                    | AJ_606301                   |
|               | F: CAGTAACATGGAGCTGCAGAGG      |                        |                             |
| <b>Bcl2l1</b> | R: GCCTTGAGCACCAAGTTTACTGG     | 119                    | NM_214285                   |
|               | F: CTGGTGGTTGACTTCTCTCCTAC     |                        |                             |

R: GTTTCCGCTTCTGATTCAGTCC  
 F: AATCTCGGGTGGCTGAACGC  
 18s 143 NR\_002170  
 R: CCGTTCTTAGTTGGTGGAGCGAT

**Table B. Oocyte maturation and PA embryo development after GV stage oocytes injected with FITC labeled nonsilencing siRNA.**

| Groups  | No.<br>oocytes<br>(rep) | No.<br>maturation<br>(mean ±<br>SEM%) | No.<br>embryos       | No. cleavage<br>(mean ±<br>SEM%)* | No.<br>blastocysts<br>(mean ±<br>SEM%)* |
|---------|-------------------------|---------------------------------------|----------------------|-----------------------------------|-----------------------------------------|
| Normal  | 234(3)                  | 174<br>(74.36±0.31)                   | 174                  | 163<br>(93.42±1.49)               | 67<br>(38.45±1.64)                      |
| Control | 440(3)                  | 322<br>(72.56±1.68)                   | 159 <sup>&amp;</sup> | 148<br>(92.97±0.97)               | 64<br>(40.33±0.68)                      |
| GV-FITC | 241(3)                  | 176<br>(72.85±1.35)                   | 175                  | 161<br>(91.97±0.74)               | 69<br>(40.04±2.82)                      |

Note: the normal group, culture of COCs, the control group, culture of denude oocytes plus mural granulosa cells, and the GV-FITC group, culture of denude oocytes injected with FITC labeled nonsilencing siRNA plus mural granulosa cells.

\*Cleavage and blastocyst rates were adjusted for the cultured embryos.

<sup>&</sup>Matured oocytes were partly used for PA in the control group.

**Table C. Development of PA, IVF and SCNT embryos after siRNA injection**

into MII stage oocytes.

| Pattern | Groups injection | No. embryos (rep)* | No. embryos cleaved (% $\pm$ SEM) | No. blastocysts (% $\pm$ SEM ) | Blastocyst cell numbers (mean $\pm$ SEM)& |
|---------|------------------|--------------------|-----------------------------------|--------------------------------|-------------------------------------------|
| PA      | control          | 151(3)             | 139<br>(92.05 $\pm$ 1.04)         | 58<br>(38.53 $\pm$ 1.10)       | 36 $\pm$ 2<br>(n=57)                      |
|         |                  |                    | 134<br>(92.46 $\pm$ 1.16)         | 54<br>(37.39 $\pm$ 2.00)       | 36 $\pm$ 3<br>(n=54)                      |
|         | negative         | 144(3)             | 133<br>(92.43 $\pm$ 1.12)         | 53<br>(36.94 $\pm$ 1.94)       | 35 $\pm$ 3<br>(n=51)                      |
|         |                  |                    | 145<br>(91.83 $\pm$ 1.09)         | 55<br>(34.87 $\pm$ 1.72)       | 36 $\pm$ 2<br>(n=53)                      |
|         | siRNA            | 158(3)             |                                   |                                |                                           |
| IVF     | control          | 147(3)             | 100<br>(68.05 $\pm$ 1.45)         | 25<br>(17.03 $\pm$ 0.77)       | 37 $\pm$ 3<br>(n=25)                      |
|         |                  |                    | 97<br>(67.38 $\pm$ 1.53)          | 25<br>(17.42 $\pm$ 0.76)       | 36 $\pm$ 2<br>(n=24)                      |
|         | negative         | 144(3)             | 98<br>(67.97 $\pm$ 1.06)          | 25<br>(17.41 $\pm$ 0.86)       | 37 $\pm$ 2<br>(n=25)                      |
|         |                  |                    | 102<br>(66.66 $\pm$ 1.96)         | 25<br>(16.29 $\pm$ 0.90)       | 37 $\pm$ 2<br>(n=25)                      |
|         | siRNA            | 153(3)             |                                   |                                |                                           |
| SCNT    | control          | 151(3)             | 128<br>(84.72 $\pm$ 1.20)         | 27<br>(17.89 $\pm$ 0.47)       | 37 $\pm$ 2<br>(n=27)                      |
|         |                  | (70.50 $\pm$ 1.69) |                                   |                                |                                           |
|         | water            | 142(3)             | 122<br>(86.03 $\pm$ 0.93)         | 26<br>(18.25 $\pm$ 0.68)       | 36 $\pm$ 2<br>(n=25)                      |
|         |                  | (67.56 $\pm$ 0.44) |                                   |                                |                                           |

|          |                        |                     |                    |                |
|----------|------------------------|---------------------|--------------------|----------------|
| negative | 146(3)<br>(67.87±1.10) | 124<br>(84.88±0.93) | 22<br>(17.74±0.13) | 35±3<br>(n=21) |
| siRNA    | 155(3)<br>(69.02±1.28) | 133<br>(85.79±0.19) | 25<br>(18.83±0.35) | 36±3<br>(n=25) |

\*Embryos in the SCNT group were the fused embryos, and the percentages in the bracket were the fusion rates.

&Blastocyst cell numbers of less than 16 were not included.

**Table D. Development of PA embryos derived from GV stage oocytes injected with different interference siRNAs.**

| Groups           | No. of embryos<br>(rep) | No. cleavage (mean ±<br>SEM %)  | No. blastocysts (mean<br>± SEM %) |
|------------------|-------------------------|---------------------------------|-----------------------------------|
| <b>control</b>   | 148 (3)                 | 138 (93.23±0.71) <sup>a</sup>   | 58 (39.21±1.42) <sup>a</sup>      |
| <b>siRNA-RFD</b> | 155 (3)                 | 138 (88.99±0.88) <sup>b</sup>   | 42 (27.16±1.60) <sup>b</sup>      |
| <b>siRNA-BAH</b> | 159 (3)                 | 140 (88.06± 0.42) <sup>bc</sup> | 32 (20.10±0.89) <sup>c</sup>      |
| <b>siRNA-DCM</b> | 158 (3)                 | 135 (85.45±0.32) <sup>c</sup>   | 26 (16.43±0.92) <sup>d</sup>      |

<sup>a-d</sup>Values in the same column with different superscripts differ significantly (P<0.05).
